# Supplementary material
Source: publisher site journal article supplement (https://www.dovepress.com/article/212137)
Supplement: Supplementary file 1 [file get_supplementary_file.php]

***Supplemental Material***

**Part 1:**

**Table S1**: Summary of demographics and scores from behavioral questionnaires

Footnote:

1. For sex, 1 = male, 2 = female
2. BDI: total score from the Beck Depression Inventory, where a total score of 0-10 is within normal emotional range; 11-16 signifies mild mood disturbance; 17-20 borderline, 21-30 moderation, 31-40 severe and >40 extreme clinical depression.
3. FPQ: total score from the Fear of Pain Questionnaire. The total score of FPQ ranges from 30 (minimal fear) to 150 (extreme fear).
4. ASI: total score from the Anxiety Sensitivity Index. The total score of ASI ranges from 0 to 64, proportional to the degree of subjective fear and aversion of various anxiety symptoms.
5. STAI-Y1: total score from the trait questionnaire of the Spielberger’s State-Trait Anxiety Inventory. The total score of STAI-Y1 ranges from 20 to 80 with higher scores correlating with greater state of anxiety.

**Part 2. Raw data from each of the 5 trials on day 4 (B series) and on day 11 (D series) for all 19 participants**


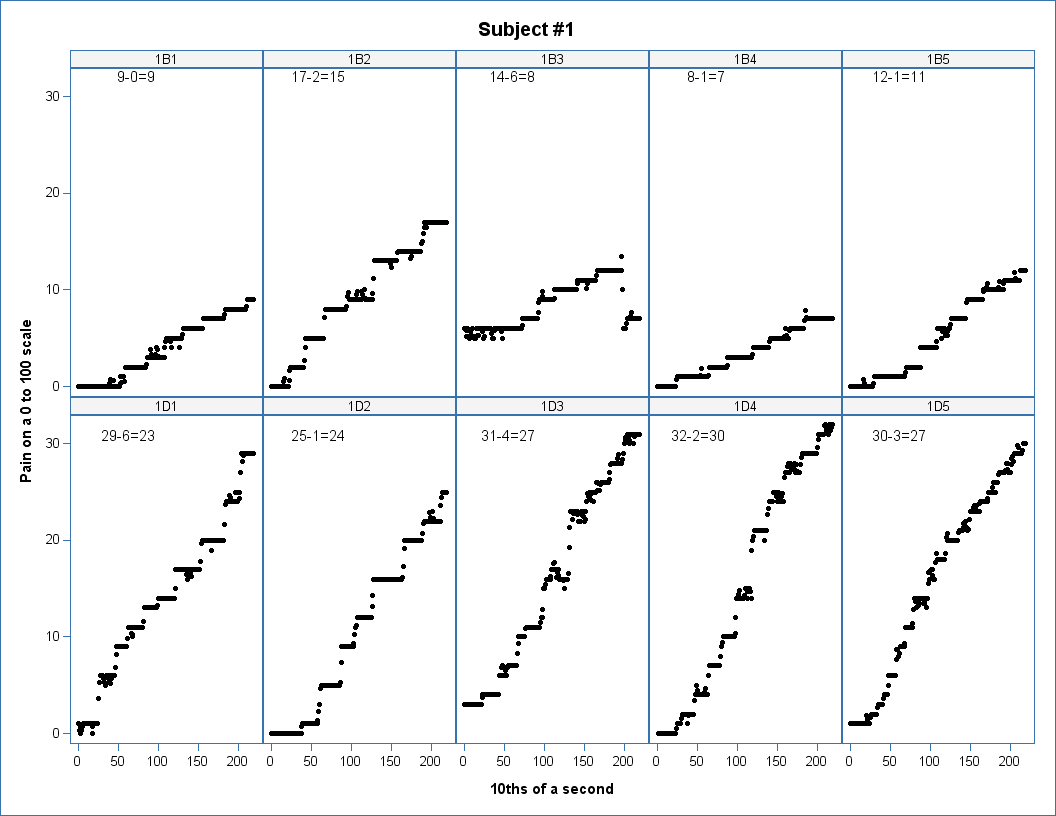


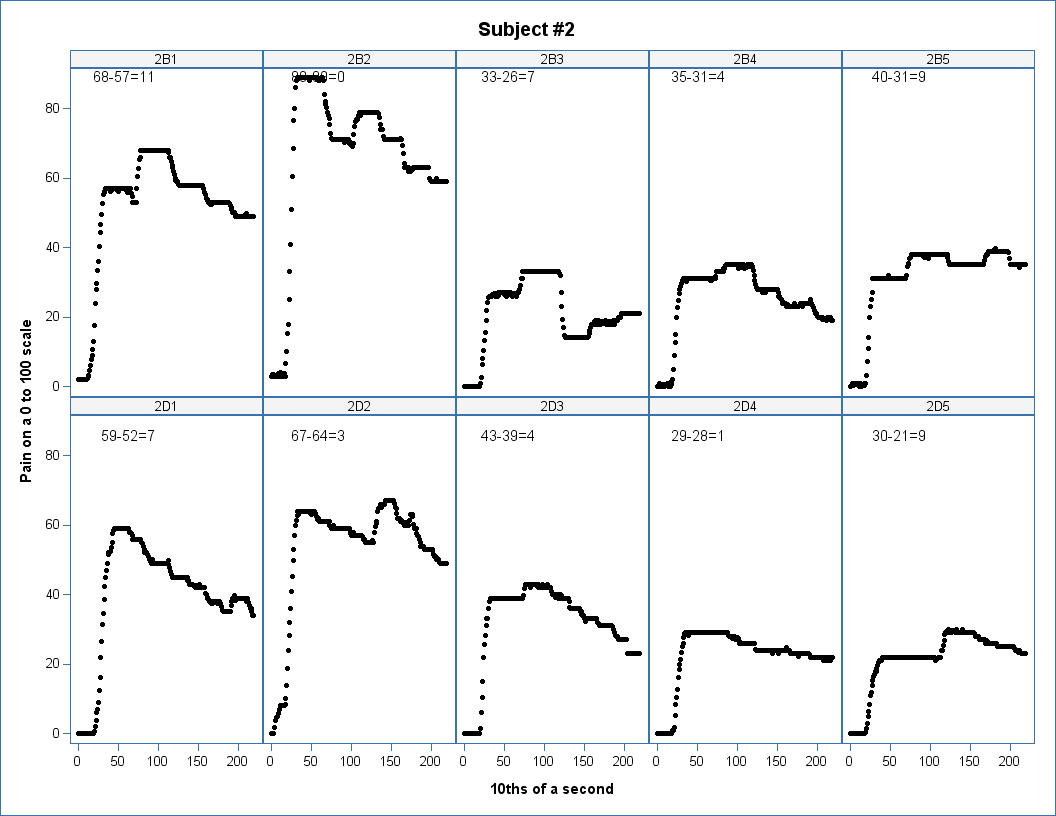


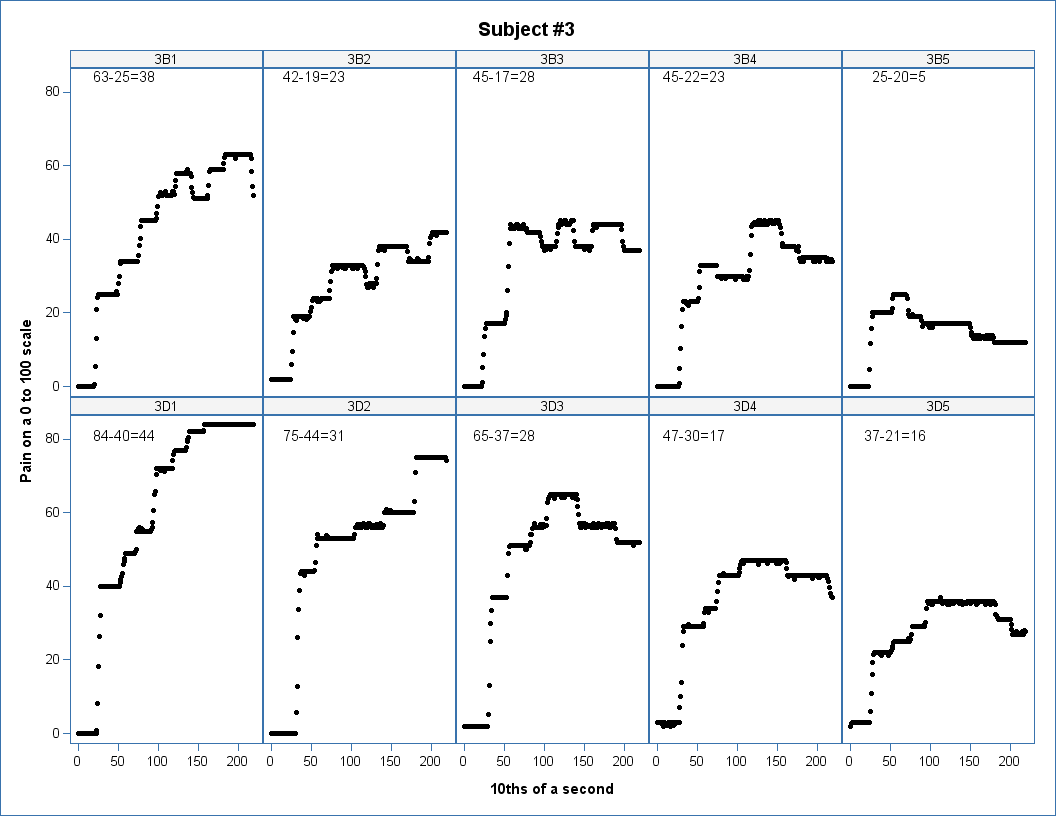


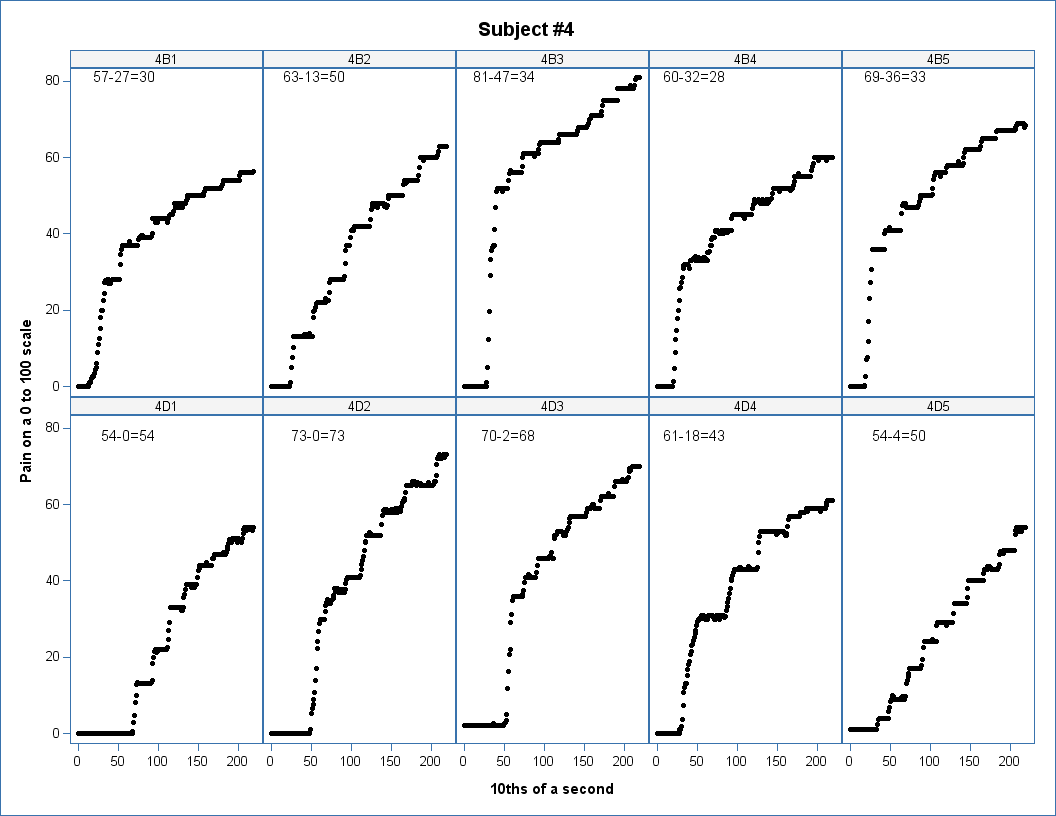


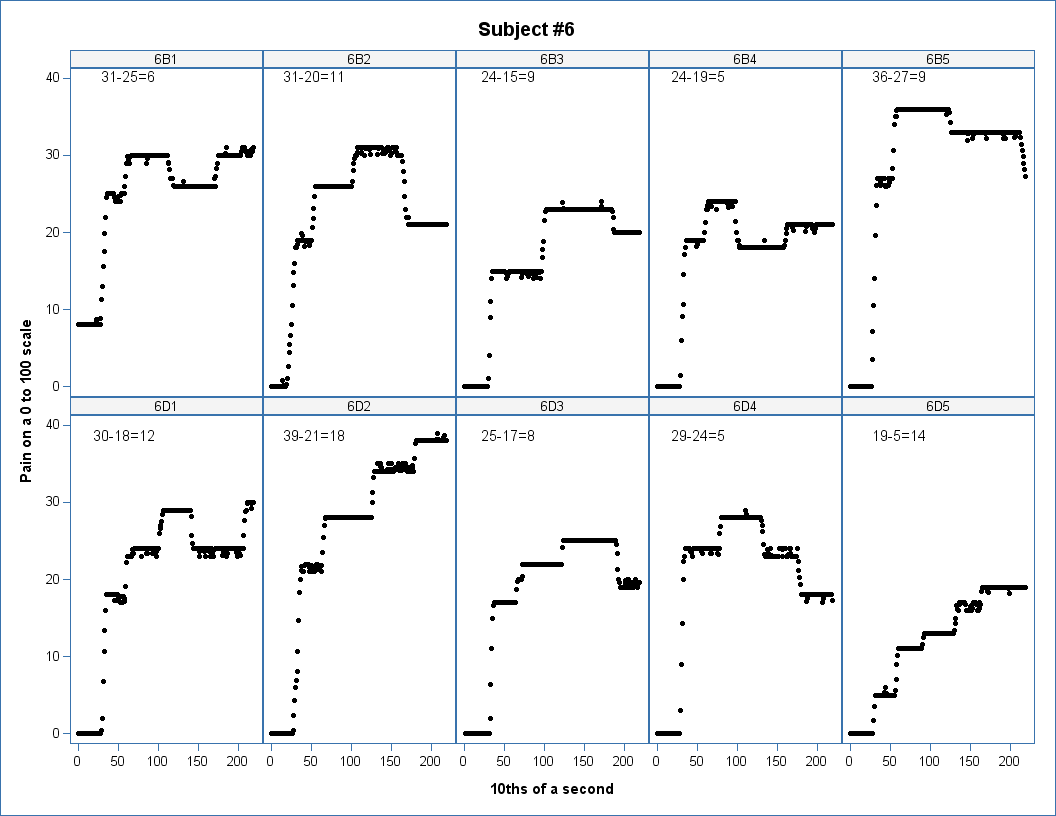

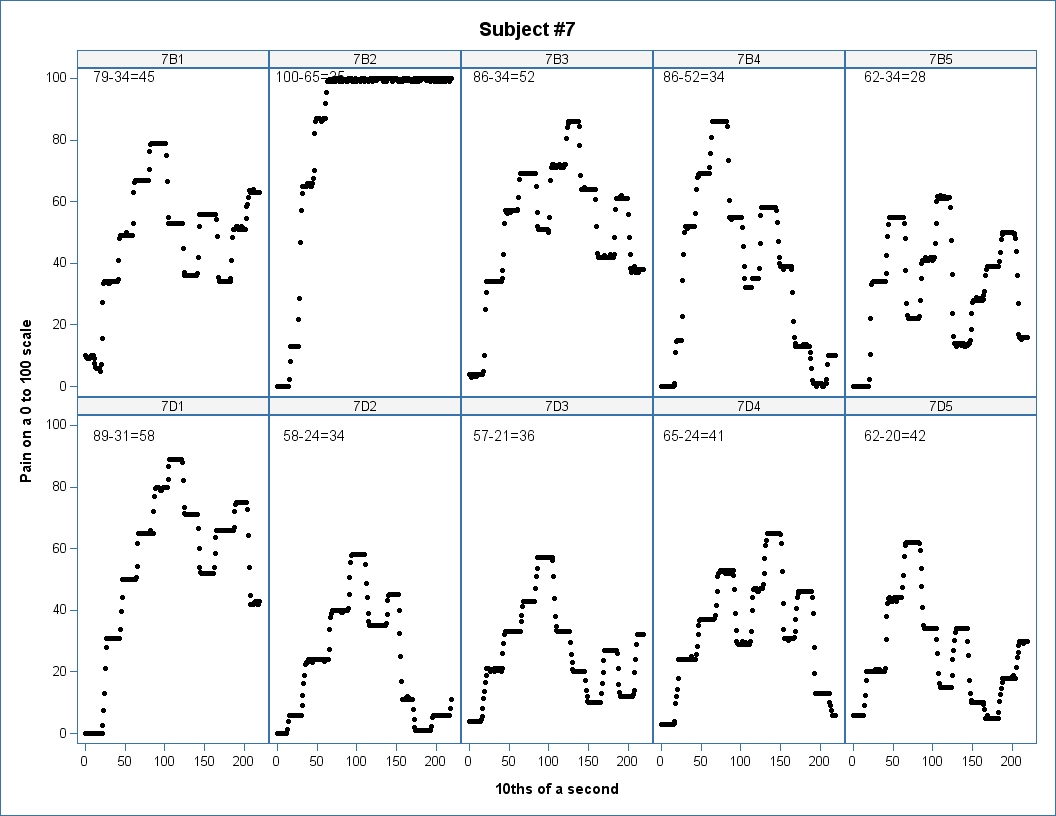


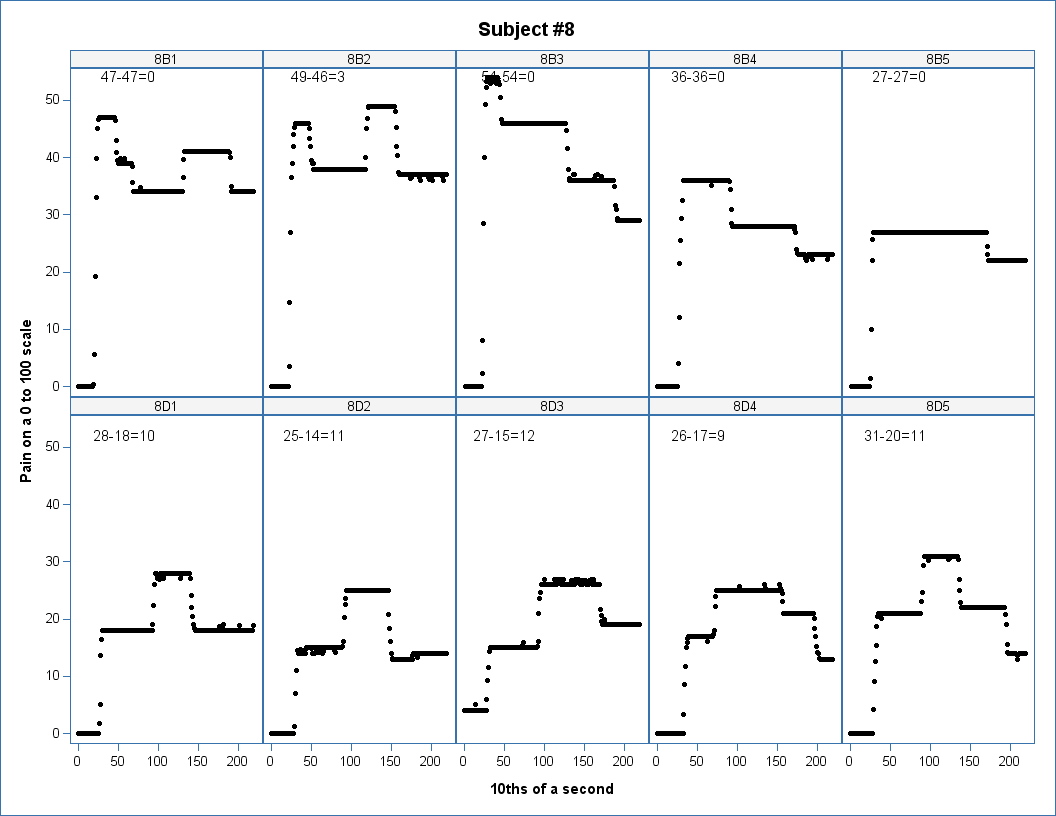


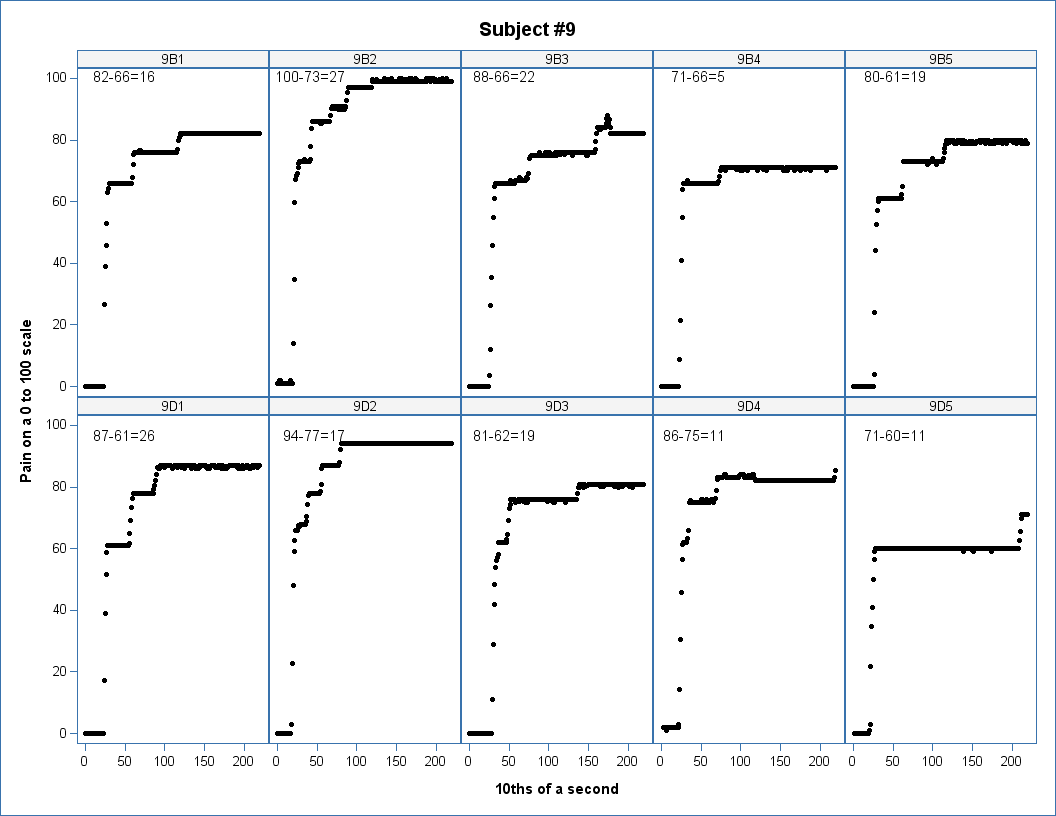


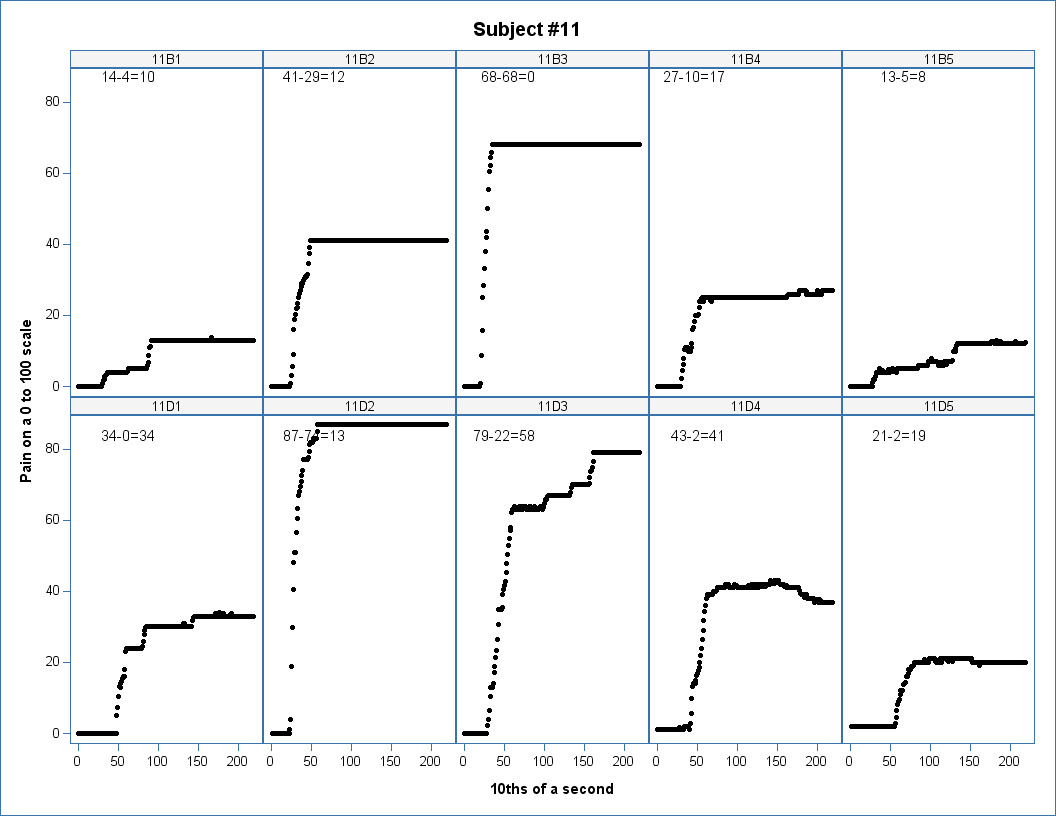


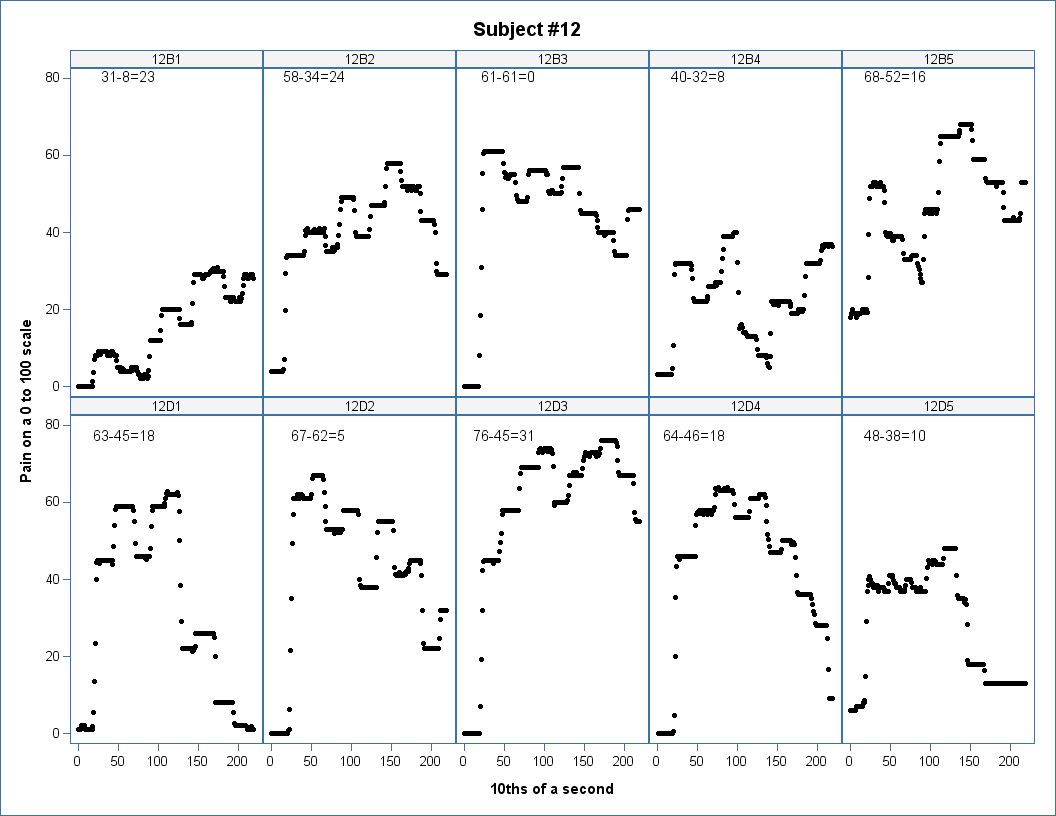


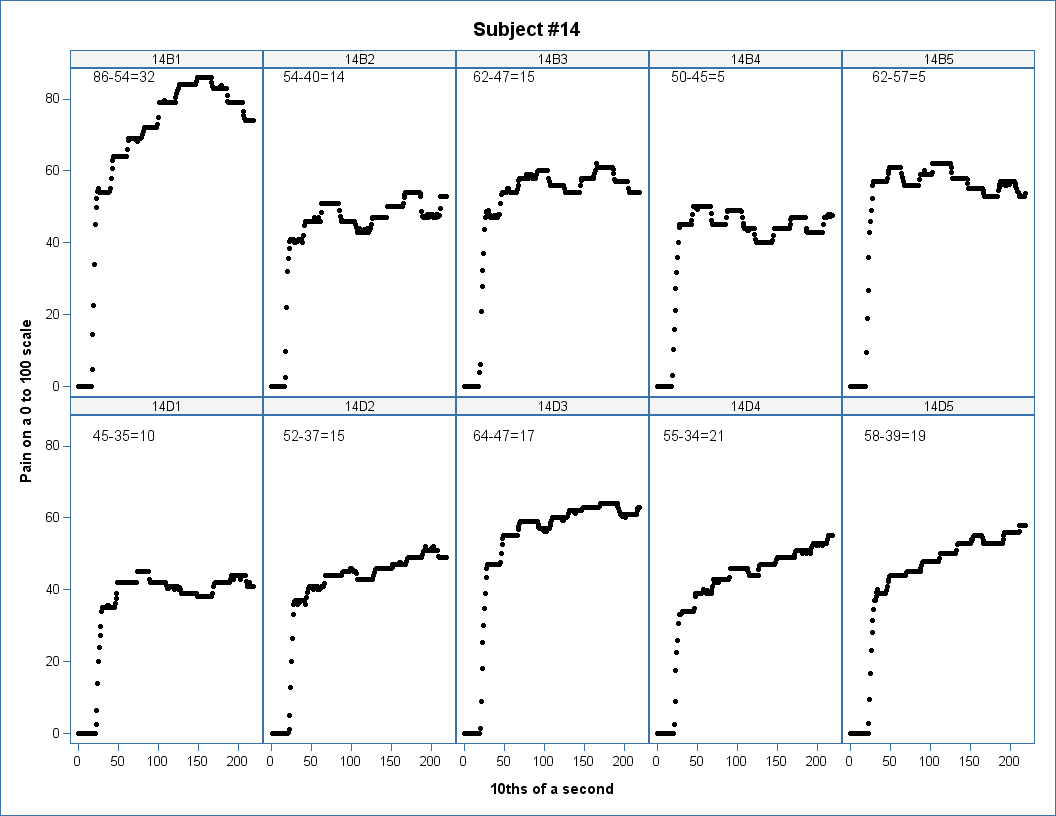


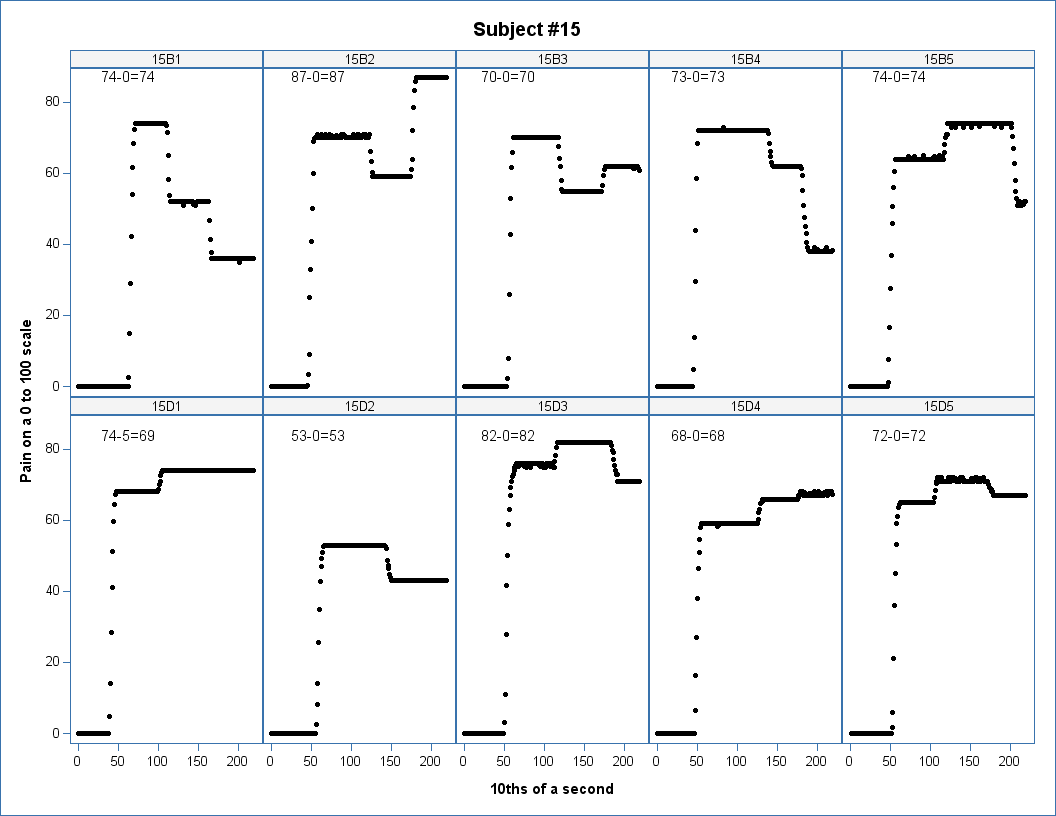


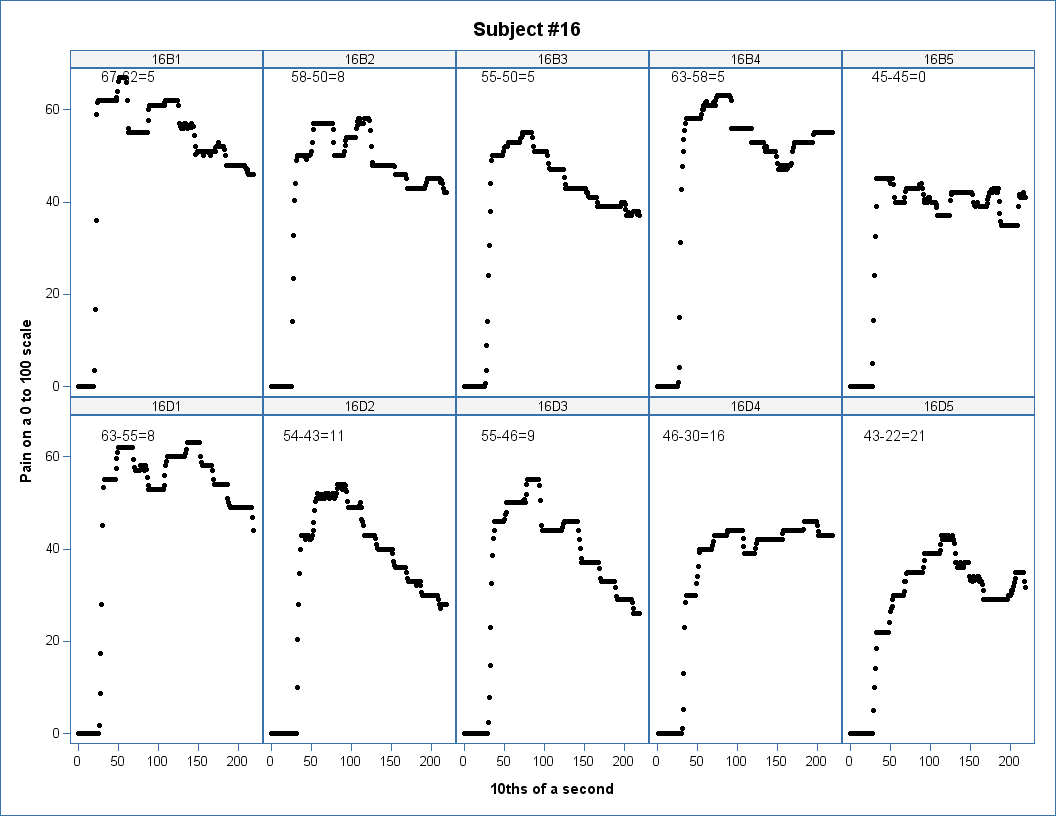


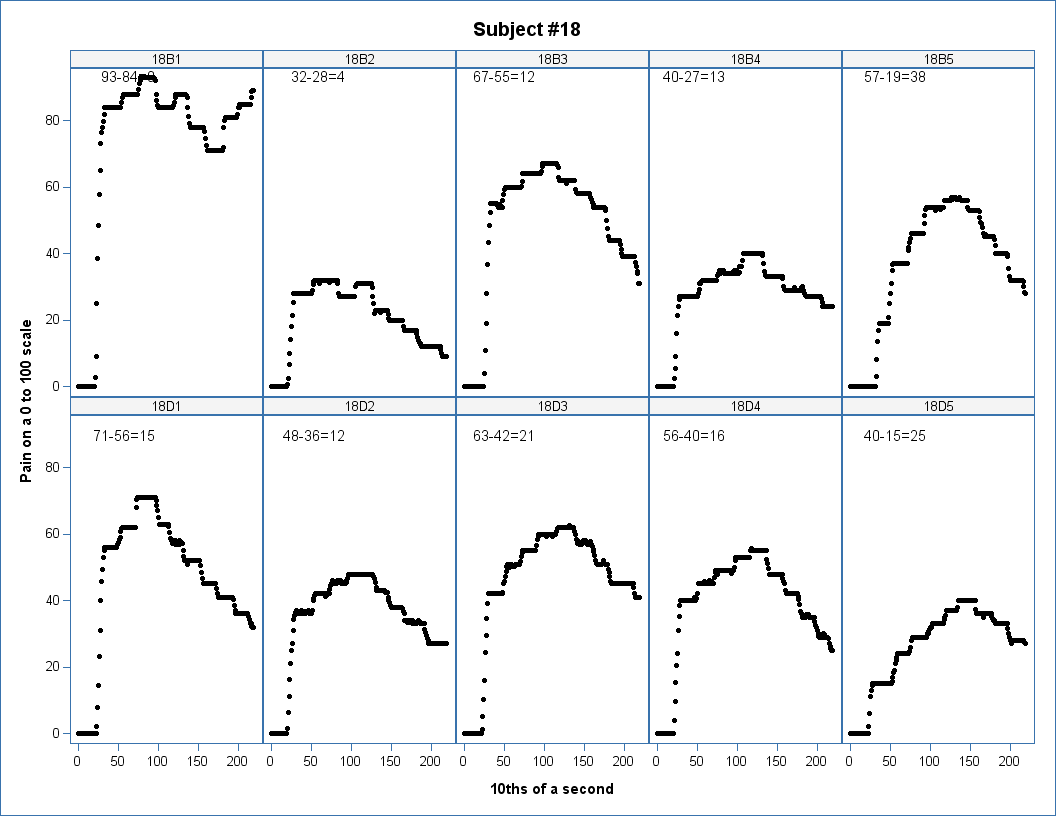


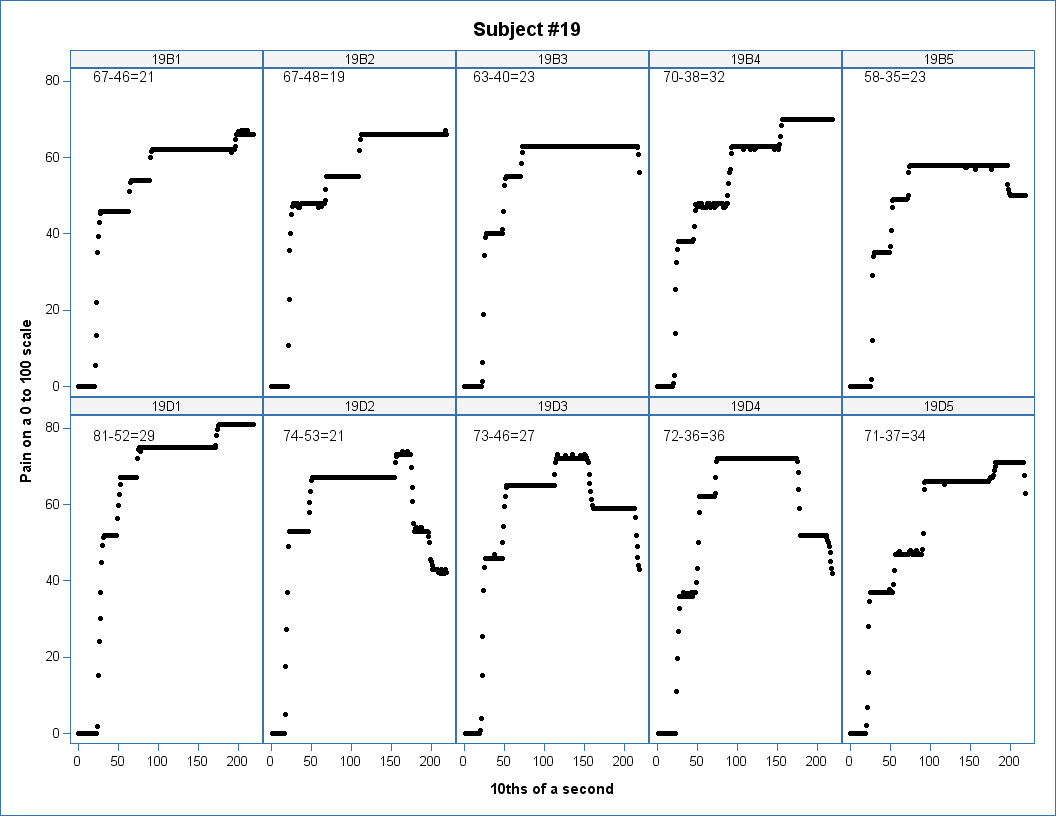


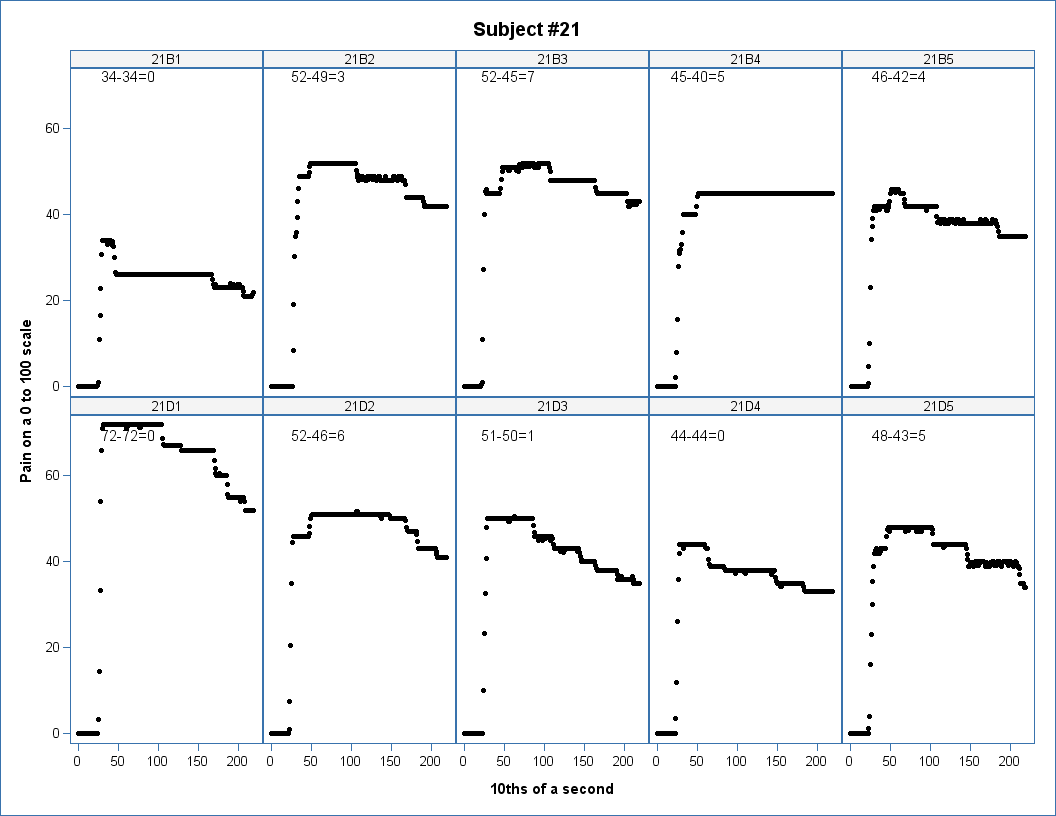


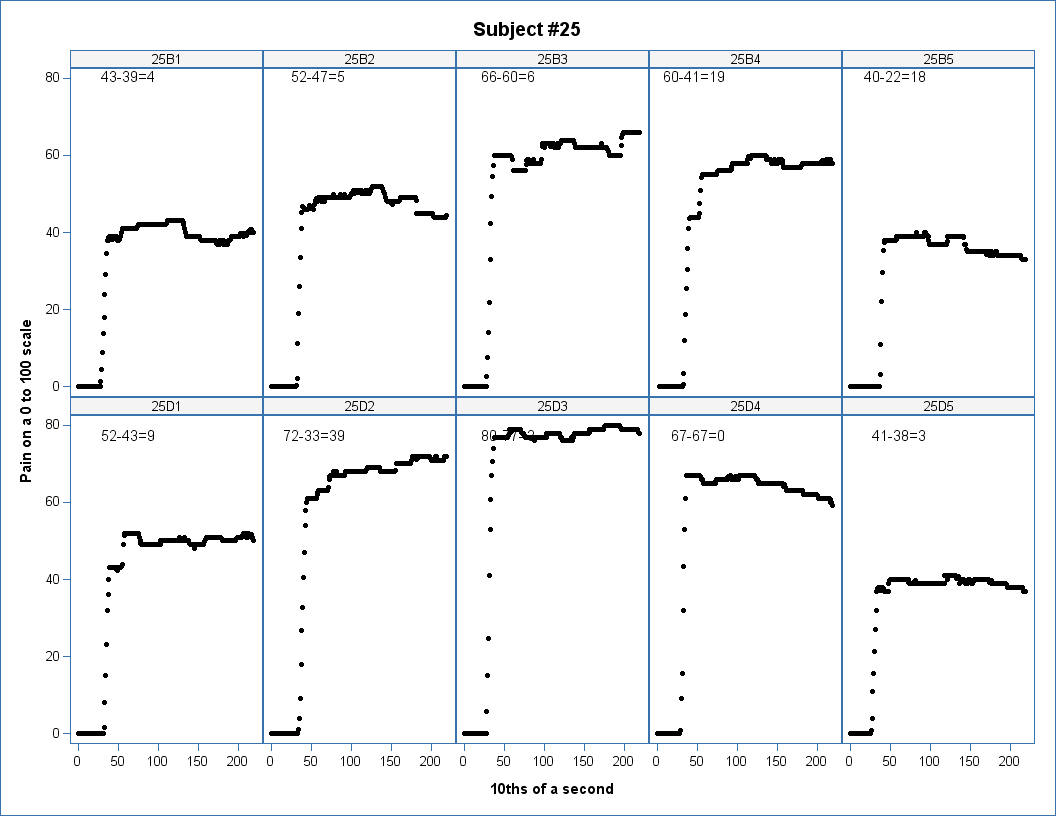


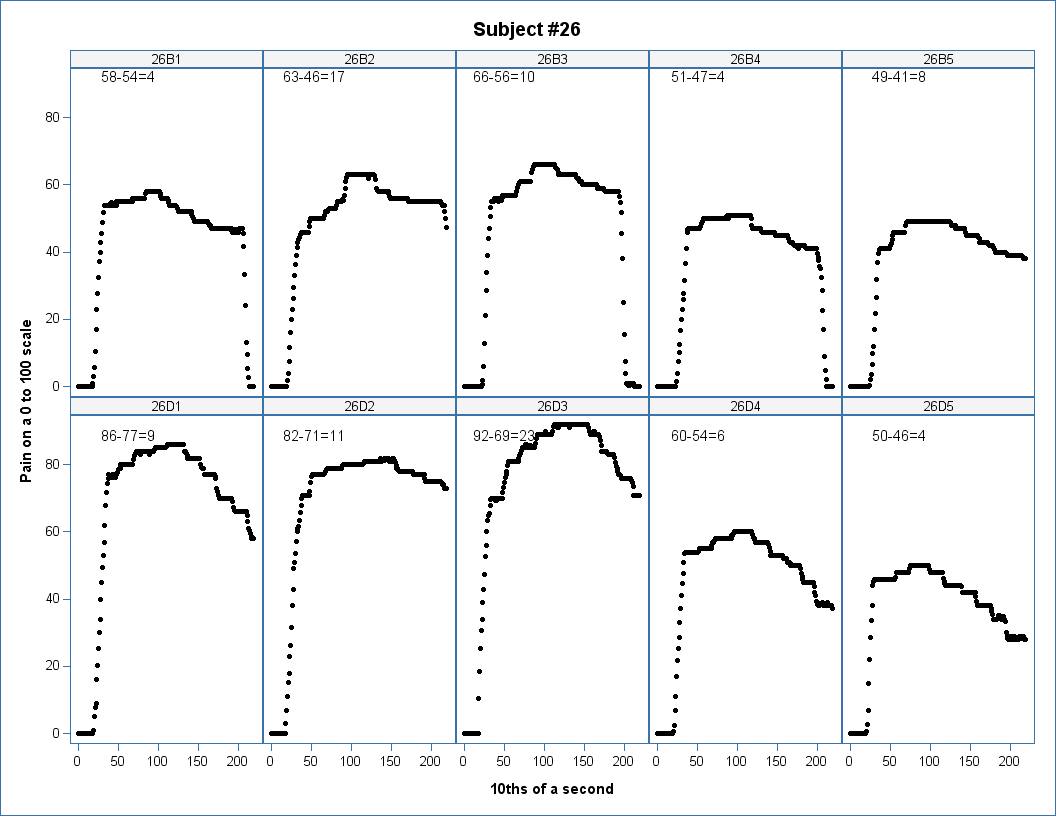


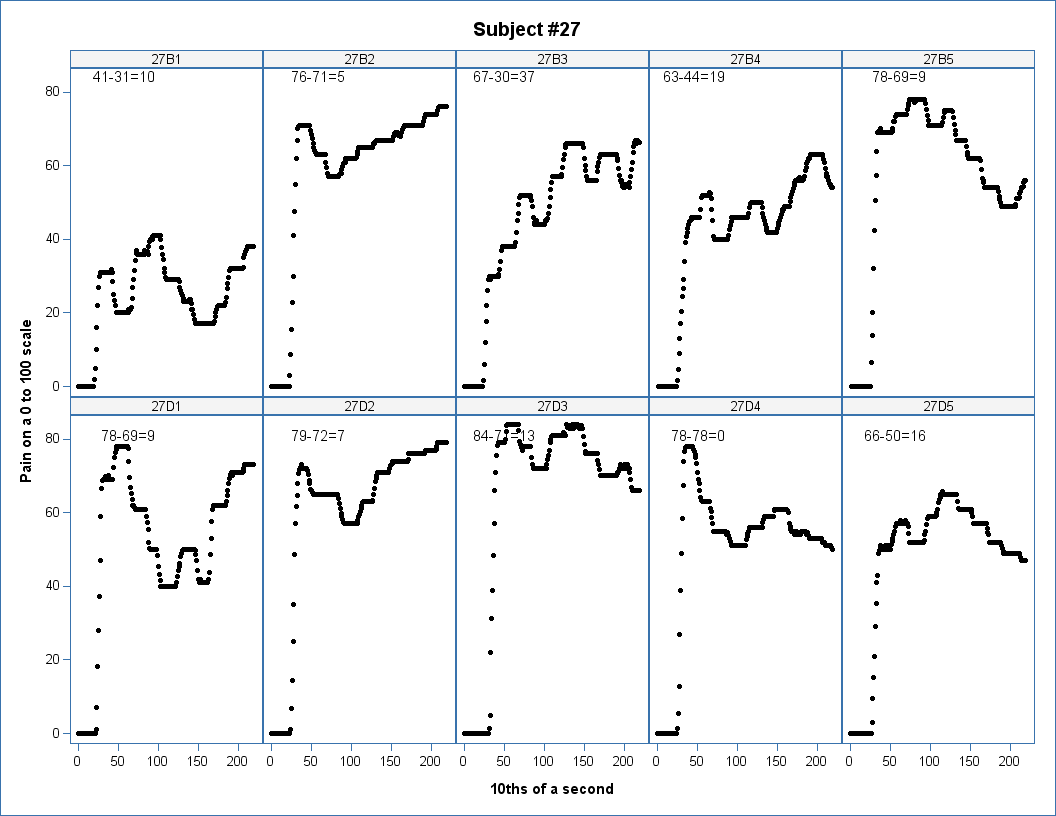


**Part 3. Mean TS response curves for Day 4 (B-series from part 2) and Day 11 (D-series from part 2)**

| 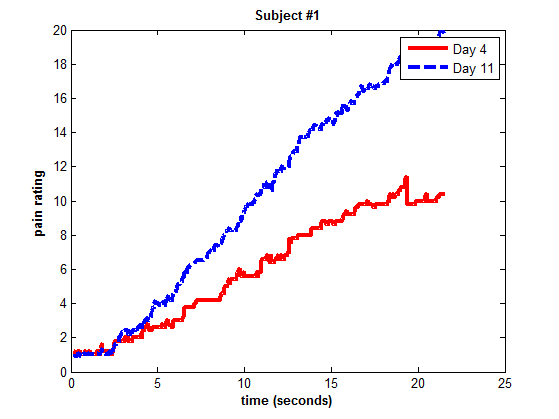 | 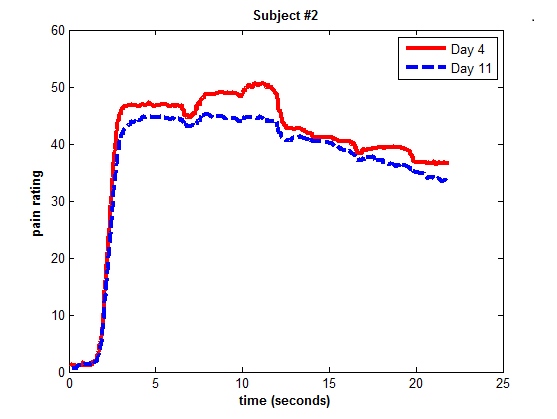 |
| --- | --- |
| 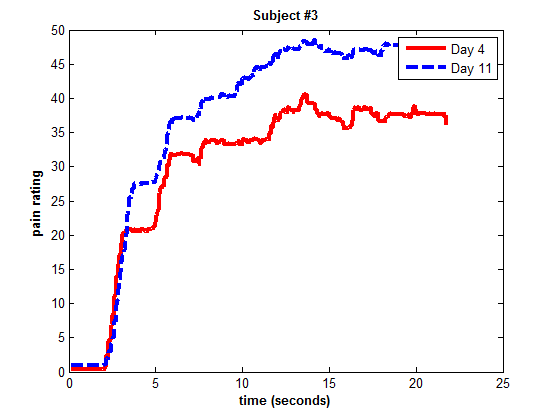 | 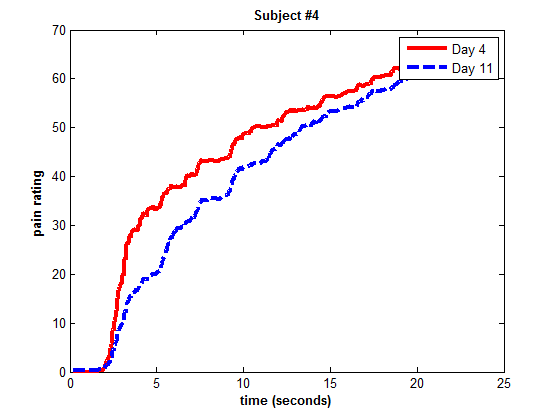 |
| 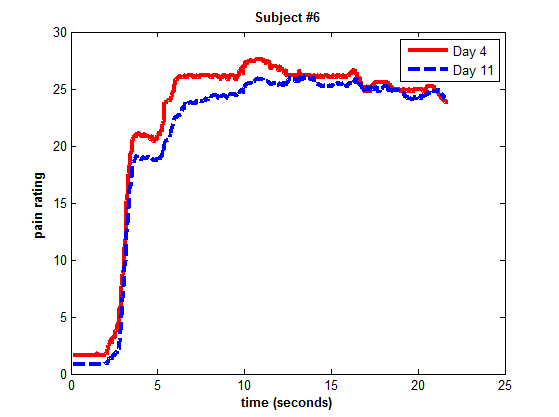 | 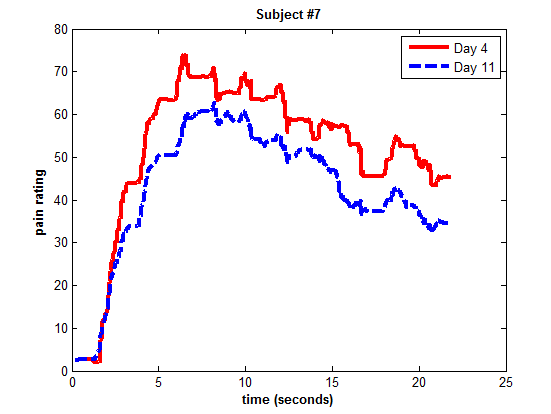 |
| 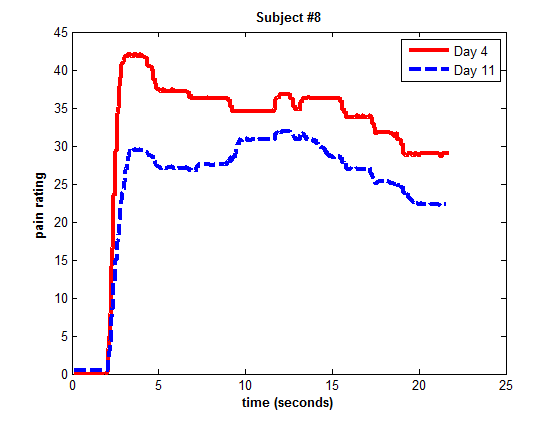 | 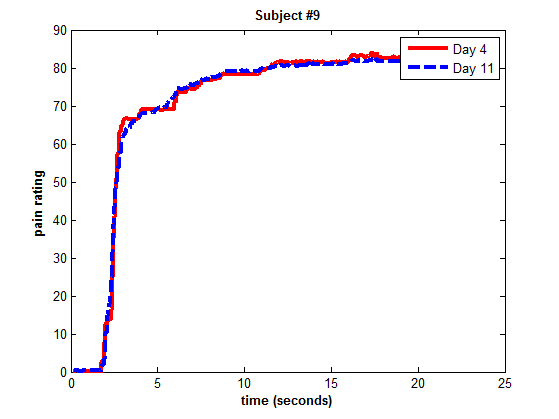 |
| 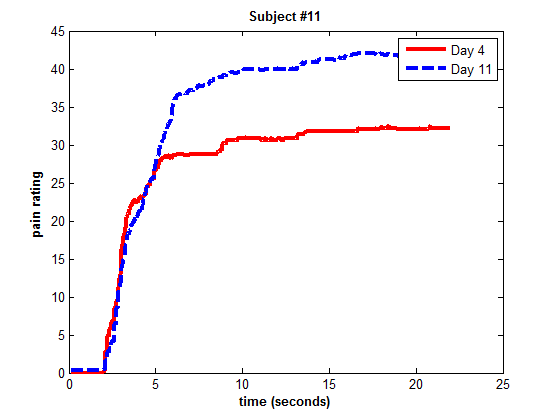 | 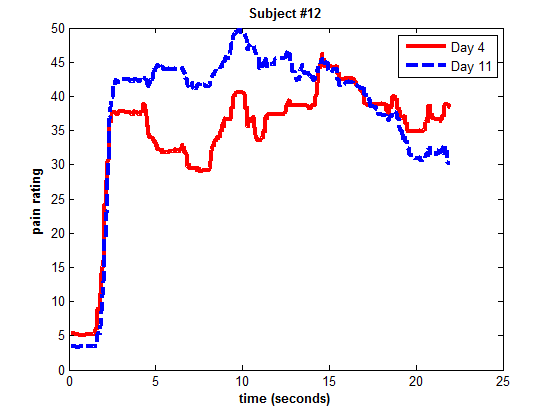 |
| 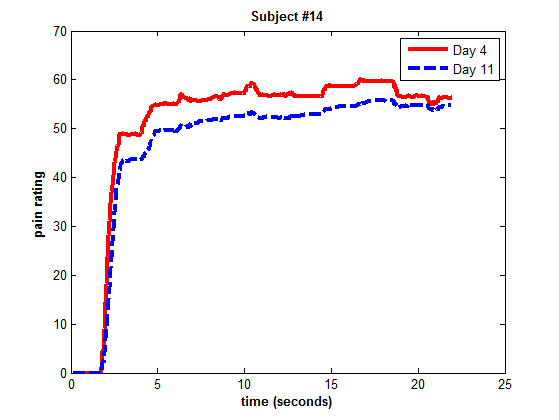 | 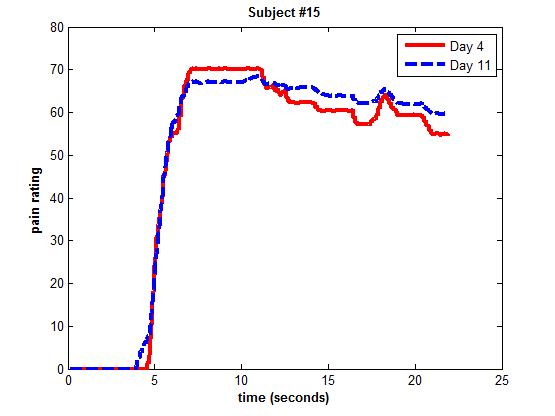 |
| 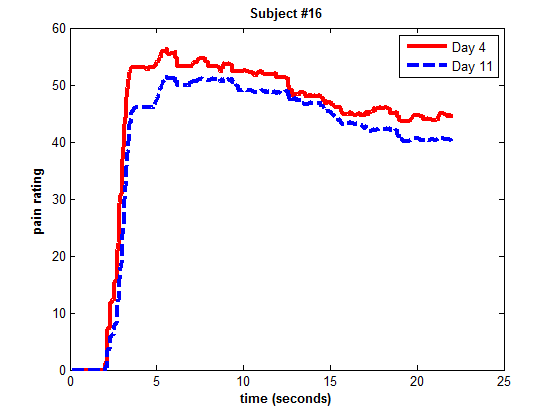 | 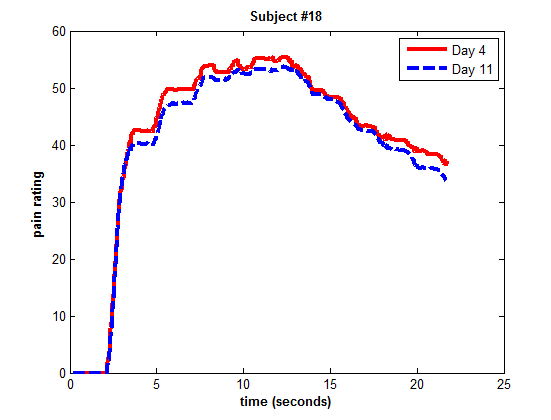 |
| 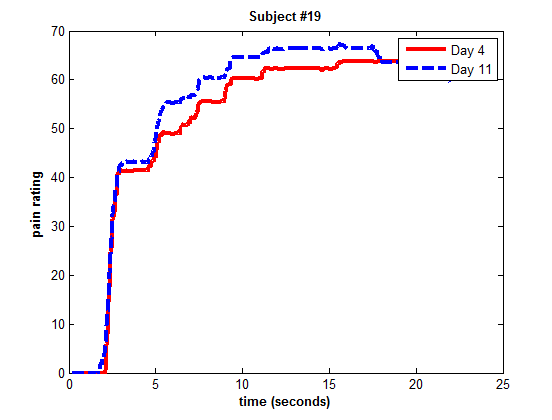 | 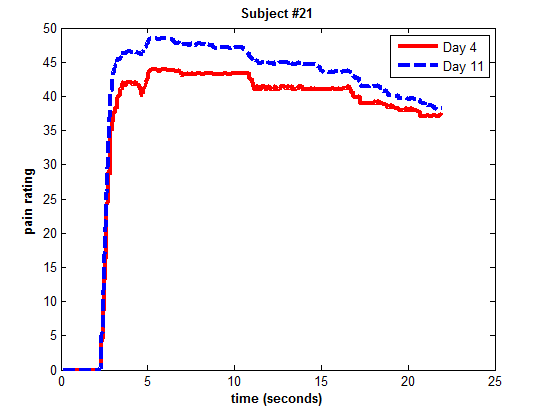 |
| 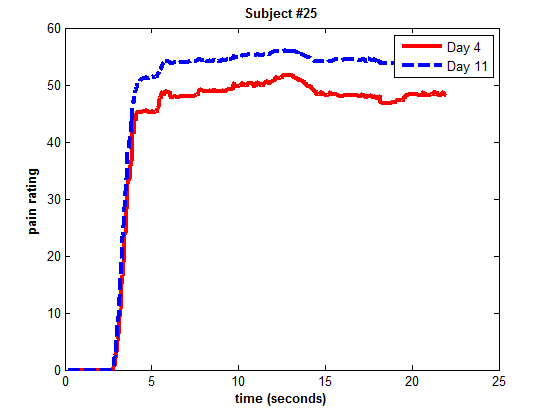 | 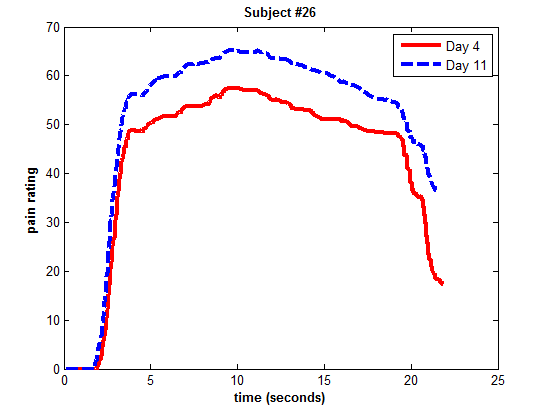 |
| 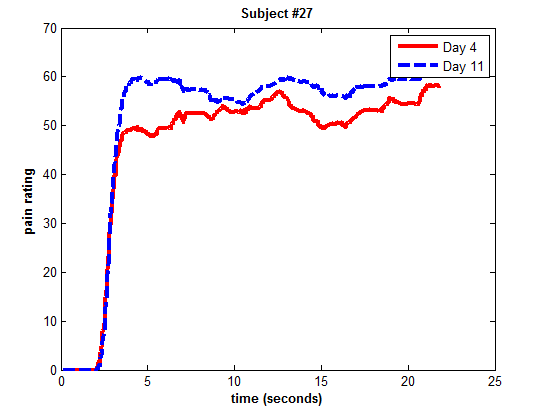 |  |
